# Supplementary material for: Imprinted Cdkn1c genomic locus cell-autonomously promotes cell survival in cerebral cortex development
Source: PubMed Central journal article supplement (PMC6954230; doi:10.1038/s41467-019-14077-2), 2020-01-10
Supplement: 41467_2019_14077_MOESM8_ESM.pdf [file 41467_2019_14077_MOESM8_ESM.pdf]

## Reporting Summary

Nature Research wishes to improve the reproducibility of the work that we publish. This form provides structure for consistency and transparency in reporting. For further information on Nature Research policies, see [Authors & Referees](#) and the [Editorial Policy Checklist](#).

### Statistics

For all statistical analyses, confirm that the following items are present in the figure legend, table legend, main text, or Methods section.

n/a Confirmed

- |                                     |                                     |                                                                                                                                                                                                                                                            |
|-------------------------------------|-------------------------------------|------------------------------------------------------------------------------------------------------------------------------------------------------------------------------------------------------------------------------------------------------------|
| <input type="checkbox"/>            | <input checked="" type="checkbox"/> | The exact sample size ( $n$ ) for each experimental group/condition, given as a discrete number and unit of measurement                                                                                                                                    |
| <input type="checkbox"/>            | <input checked="" type="checkbox"/> | A statement on whether measurements were taken from distinct samples or whether the same sample was measured repeatedly                                                                                                                                    |
| <input type="checkbox"/>            | <input checked="" type="checkbox"/> | The statistical test(s) used AND whether they are one- or two-sided<br><i>Only common tests should be described solely by name; describe more complex techniques in the Methods section.</i>                                                               |
| <input checked="" type="checkbox"/> | <input type="checkbox"/>            | A description of all covariates tested                                                                                                                                                                                                                     |
| <input checked="" type="checkbox"/> | <input type="checkbox"/>            | A description of any assumptions or corrections, such as tests of normality and adjustment for multiple comparisons                                                                                                                                        |
| <input type="checkbox"/>            | <input checked="" type="checkbox"/> | A full description of the statistical parameters including central tendency (e.g. means) or other basic estimates (e.g. regression coefficient) AND variation (e.g. standard deviation) or associated estimates of uncertainty (e.g. confidence intervals) |
| <input checked="" type="checkbox"/> | <input type="checkbox"/>            | For null hypothesis testing, the test statistic (e.g. $F$ , $t$ , $r$ ) with confidence intervals, effect sizes, degrees of freedom and $P$ value noted<br><i>Give <math>P</math> values as exact values whenever suitable.</i>                            |
| <input checked="" type="checkbox"/> | <input type="checkbox"/>            | For Bayesian analysis, information on the choice of priors and Markov chain Monte Carlo settings                                                                                                                                                           |
| <input checked="" type="checkbox"/> | <input type="checkbox"/>            | For hierarchical and complex designs, identification of the appropriate level for tests and full reporting of outcomes                                                                                                                                     |
| <input checked="" type="checkbox"/> | <input type="checkbox"/>            | Estimates of effect sizes (e.g. Cohen's $d$ , Pearson's $r$ ), indicating how they were calculated                                                                                                                                                         |

*Our web collection on [statistics for biologists](#) contains articles on many of the points above.*

### Software and code

Policy information about [availability of computer code](#)

Data collection

Data analysis

For manuscripts utilizing custom algorithms or software that are central to the research but not yet described in published literature, software must be made available to editors/reviewers. We strongly encourage code deposition in a community repository (e.g. GitHub). See the Nature Research [guidelines for submitting code & software](#) for further information.

### Data

Policy information about [availability of data](#)

All manuscripts must include a [data availability statement](#). This statement should provide the following information, where applicable:

- Accession codes, unique identifiers, or web links for publicly available datasets
- A list of figures that have associated raw data
- A description of any restrictions on data availability

## Field-specific reporting

Please select the one below that is the best fit for your research. If you are not sure, read the appropriate sections before making your selection.

- Life sciences       Behavioural & social sciences       Ecological, evolutionary & environmental sciences

For a reference copy of the document with all sections, see [nature.com/documents/nr-reporting-summary-flat.pdf](https://www.nature.com/documents/nr-reporting-summary-flat.pdf)

## Life sciences study design

All studies must disclose on these points even when the disclosure is negative.

|                 |                                                                                                                                                                                                                |
|-----------------|----------------------------------------------------------------------------------------------------------------------------------------------------------------------------------------------------------------|
| Sample size     | No statistical method was used to determine sample size. Variations between samples were used to determine appropriateness of sample size. In addition, sample sizes were based upon previously reported data. |
| Data exclusions | Nothing to declare                                                                                                                                                                                             |
| Replication     | All replications were consistent.                                                                                                                                                                              |
| Randomization   | Groups were assigned based on genotype.                                                                                                                                                                        |
| Blinding        | For the quantification of MADM-labeled cells investigators were blinded to group allocation during data collection and analysis.                                                                               |

## Reporting for specific materials, systems and methods

We require information from authors about some types of materials, experimental systems and methods used in many studies. Here, indicate whether each material, system or method listed is relevant to your study. If you are not sure if a list item applies to your research, read the appropriate section before selecting a response.

### Materials & experimental systems

| n/a                                 | Involvement in the study                                        |
|-------------------------------------|-----------------------------------------------------------------|
| <input type="checkbox"/>            | <input checked="" type="checkbox"/> Antibodies                  |
| <input checked="" type="checkbox"/> | <input type="checkbox"/> Eukaryotic cell lines                  |
| <input checked="" type="checkbox"/> | <input type="checkbox"/> Palaeontology                          |
| <input type="checkbox"/>            | <input checked="" type="checkbox"/> Animals and other organisms |
| <input checked="" type="checkbox"/> | <input type="checkbox"/> Human research participants            |
| <input checked="" type="checkbox"/> | <input type="checkbox"/> Clinical data                          |

### Methods

| n/a                                 | Involvement in the study                           |
|-------------------------------------|----------------------------------------------------|
| <input checked="" type="checkbox"/> | <input type="checkbox"/> ChIP-seq                  |
| <input type="checkbox"/>            | <input checked="" type="checkbox"/> Flow cytometry |
| <input checked="" type="checkbox"/> | <input type="checkbox"/> MRI-based neuroimaging    |

## Antibodies

Antibodies used

See also methods section.

Chicken anti-GFP 1:500 Aves Labs GFP-1020  
 Rabbit anti-RFP 1:500 MBL PM005  
 Goat anti-tdTomato 1:500 Sicgen Antibodies AB8181-200  
 Rabbit anti-Tbr1 1:500 Abcam AB31940  
 Mouse anti-SatB2 1:100 Abcam AB51502  
 Rabbit anti-Caspase-3 1:300 Promega G7481  
 Rabbit anti-Caspase-3 1:500 Cell Signaling 9662S  
 Rabbit anti-Caspase-3-A647 1:50 Cell Signaling 9602S  
 Rabbit anti-Ki67 1:200 Abcam AB15580  
 Rabbit anti-NeuroD2 1:200 Abcam AB109406  
 Rabbit anti-Pax6 1:500 Cell Signaling 60433S  
 Mouse anti-P53 1:100 Cell Signaling 48818  
 Rabbit anti-pH3 1:300 Cell Signaling 3377T  
 Donkey Anti-Chicken Alexa Fluor 488 1:500 Jackson Immuno Research 715-475-150  
 Donkey Anti-Goat Cy3 1:500 Jackson Immuno Research 705-165-147  
 Donkey Anti-Rabbit Cy3 1:500 Jackson Immuno Research 711-165-152  
 Donkey Anti-Rabbit Alexa Fluor 647 1:500 Jackson Immuno Research 711-605-152  
 Donkey Anti-Mouse Alexa Fluor 647 1:500 Jackson Immuno Research 715-605-151  
 Donkey Anti-Rabbit DyLight 405 1:300 Jackson Immuno Research 711-475-152  
 Donkey Anti-Mouse DyLight 405 1:500 Jackson Immuno Research 715-475-150  
 Donkey Anti-Goat Alexa Fluor 568 1:100 Molecular Probes A11057  
 Donkey Anti-Rabbit Alexa Fluor 647 1:1000 Molecular Probes A31573  
 Donkey Anti-Rabbit Alexa Fluor 568 1:1000 Molecular Probes A10042

Validation

All validation is provided by the commercial vendors.

## Animals and other organisms

Policy information about [studies involving animals](#); [ARRIVE guidelines](#) recommended for reporting animal research

|                         |                                                                                                                                                                                                                                                                                                                                                                                                      |
|-------------------------|------------------------------------------------------------------------------------------------------------------------------------------------------------------------------------------------------------------------------------------------------------------------------------------------------------------------------------------------------------------------------------------------------|
| Laboratory animals      | See also methods section.<br><br>Mouse lines:<br>Mouse: MADM-7-GT The Jackson Laboratory IMSR_JAX: 021457<br>Mouse: MADM-7-TG The Jackson Laboratory IMSR_JAX: 021458<br>Mouse: Emx1-Cre The Jackson Laboratory IMSR_JAX: 005628<br>Mouse: Cdkn1c-flox (Matsumoto et al. 2011)<br>Mouse: CAST/EiJ The Jackson Laboratory IMSR_JAX: 000928<br>Mouse: C57BL/6J The Jackson Laboratory IMSR_JAX: 000664 |
| Wild animals            | n/a                                                                                                                                                                                                                                                                                                                                                                                                  |
| Field-collected samples | n/a                                                                                                                                                                                                                                                                                                                                                                                                  |
| Ethics oversight        | Mouse protocols were reviewed by institutional preclinical core facility (PCF) at IST Austria and an institutional ethics committee. All breeding and experimentation was performed under a license approved by the Austrian Federal Ministry of Science and Research in accordance with the Austrian and EU animal laws.                                                                            |

Note that full information on the approval of the study protocol must also be provided in the manuscript.

## Flow Cytometry

### Plots

Confirm that:

- The axis labels state the marker and fluorochrome used (e.g. CD4-FITC).
- The axis scales are clearly visible. Include numbers along axes only for bottom left plot of group (a 'group' is an analysis of identical markers).
- All plots are contour plots with outliers or pseudocolor plots.
- A numerical value for number of cells or percentage (with statistics) is provided.

### Methodology

|                           |                                         |
|---------------------------|-----------------------------------------|
| Sample preparation        | See methods section.                    |
| Instrument                | FACS Aria III BD Biosciences            |
| Software                  | BD FACSDIVA Software or FlowJo Software |
| Cell population abundance | See methods section.                    |
| Gating strategy           | See methods section.                    |

- Tick this box to confirm that a figure exemplifying the gating strategy is provided in the Supplementary Information.
